# Supplementary material
Source: PubMed Central journal article supplement (PMC7186210)
Supplement: mmc1.pdf [file mmc1.pdf]

An Effective CTL Peptide Vaccine for Ebola Zaire  
Based on Survivors' CD8+ Targeting of a Particular  
Nucleocapsid Protein Epitope with Potential  
Implications for COVID-19 Vaccine Design  
SUPPLEMENTARY MATERIAL

---

---

**1. Mitigating Potential for Epitope Competitive Inhibition at the MHC**

The possibility of competitive inhibition at the MHC when a CTL vaccine containing multiple peptides is administered to a patient has been acknowledged [4]. Techniques such as splitting a CTL vaccine dose across multiple injection sites with one peptide sequence per site have been suggested to address this issue [8]. We demonstrated *in-vitro* that competitive inhibition at the MHC could occur by incubating 200,000 PBMCs per well from a reference PMBC sample (CTL Reference Sample QC Set, Cellular Technology, Ltd. Shaker Heights, Ohio), from an HLA A\*02, HIV naive subject with an HCMV Class I epitope pp65 (495-503) NLVPMVATV supplied with the Reference Sample and known to produce  $IFN - \gamma$  release in that reference PBMC sample and then introducing increasing concentrations of of an HLA A\*02 matched Class I HIV peptide. Figure 9 shows functional inhibition of MHC binding as evidenced by decreasing, and ultimate extinction of  $IFN - \gamma$  release as determined by ELISA assay with increasing concentrations of the HLA matched HIV peptide. This experiment suggests that competitive inhibition could occur when two different HLA matched peptide sequences are delivered to the same antigen presenting cell. The adjuvanted microspheres used in this study were manufactured to be nominally the same size as antigen presenting cells (about  $11\mu M$ ). By loading each peptide microsphere with only one peptide sequence, this mitigates

against two peptides being processed by the same antigen presenting cell at the same time. Multiple peptides can be incorporated into a vaccine formulation by blending different populations of adjuvanted microspheres into the same vaccine dose, with each microsphere containing only one peptide sequence.

## 2. Route of Administration

Intradermal injection of influenza vaccine has been shown to be more effective than intramuscular administration in human subjects [3]. Gamma scintigraphy studies have shown that the efficacy of intradermally-delivered antigen may be due to the portion of antigen that reaches the lymph system [9]. The rat peritoneal space has been demonstrated to drain into the rat lymphatics [5]. We sought to determine if H2D-Kb matched Class I epitopes delivered into the mouse intraperitoneal space with Class II epitopes would provide a stronger immune response by ELISPOT-determined  $IFN - \gamma$  release compared with intradermal and intramuscular administration to C57BL/6 mice.

Prior to conducting our challenge study, we used adjuvanted microspheres to immunize C57BL/6 mice [6]. OVA and VSV Class I and Class II epitopes known to produce an immune response in this mouse model were selected and delivered by three different routes of administration [2] [10] [7] [1]. Four different microsphere populations, each containing CpG and one of the epitopes from Table 14, were prepared. The four microsphere populations were blended 1:1:1:1 by weight and suspended just prior to administration in a PBS injectate solution containing MPLA. A total of 2mg of the microsphere preparation was administered into C57BL/6 mice by the intradermal tail (ID), intramuscular (IM) or intraperitoneal (IP) route using four mice for each route of administration. Splenocytes were harvested on day 14 and subjected to ELISPOT analysis evaluating  $IFN - \gamma$  release in response to stimulation with the peptide used in the vaccination. As illustrated in Figure 11 and Figure 10, the CTL response to each of the administered Class I epitopes was significantly higher for the IP route of administration. Guided by this data, we selected IP as the route of

vaccine administration for our EBOV challenge study.

### **3. Vaccine Formulation Composition**

Adjuvanted microspheres nominally  $11\mu\text{M}$  in diameter (geometric standard deviation 1.2) manufactured as a room temperature stable dry powder and loaded as described in Table 12 are mixed with the injectate solution described in Table 13 just prior to injection. All mice in the EBOV challenge study received nominally  $450\mu\text{l}$  of this adjuvanted microsphere suspension by intraperitoneal administration.

### **4. Separation of CD4 & CD8 T-cells for ELISPOT**

Mouse spleens were harvested and splenocytes were obtained by standard procedures. Splenocytes were counted and divided into three equal groups; one for total cell response in the ELISPOT assay, one for the ELISPOT response in the absence of CD4 cells, and the final group for the ELISPOT response in the absence of CD8 cells. CD4 and CD8 cells were removed by positive selection using magnetic beads coated with either anti-CD4 or anti-CD8 antibody respectively, and a MACS Separator (Miltenyi Biotech, Auburn, CA) according to the manufacturer's instructions. Cells not bound to the columns (i.e., unlabeled by the specific antibody) were collected, centrifuged, washed, re-centrifuged, counted, and placed in a standard ELISPOT assay as previously described.

### Mouse Observation Clinical Scores

| Scale | Description of Animal                                                                                                                                                           |
|-------|---------------------------------------------------------------------------------------------------------------------------------------------------------------------------------|
| 1     | Healthy                                                                                                                                                                         |
| 2     | Lethargic and/or ruffled fur<br>(triggers a second observation)                                                                                                                 |
| 3     | Ruffled fur, lethargic and hunched posture, orbital tightening<br>(triggers a third observation)                                                                                |
| 4     | Ruffled fur, lethargic, hunched posture, orbital tightening<br>reluctance to move when stimulated, paralysis or greater than 20% weight loss<br>(requires immediate euthanasia) |

Table 1: Clinical score indices used to track morbidity in study animals.

### Survival After 100 PFU Challenge Active *versus* Adjuvanted Microsphere Control

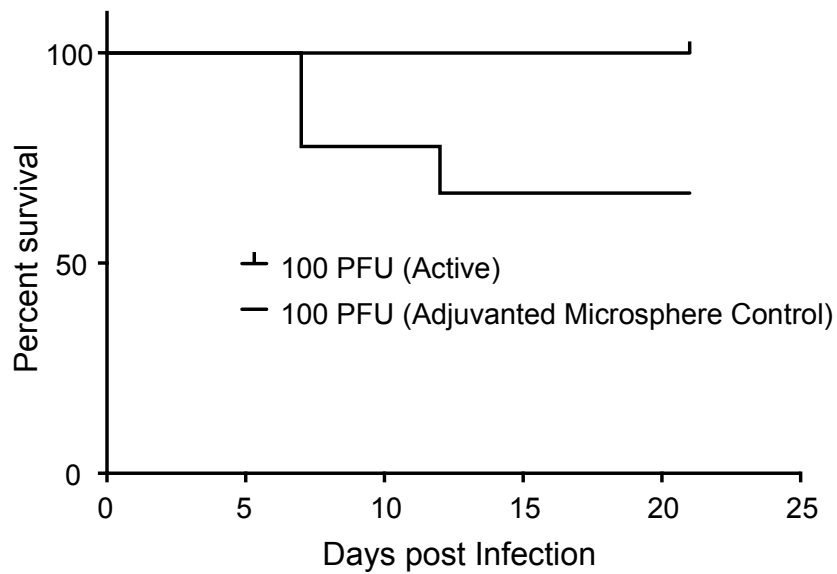

(a) Survival curve *versus* Adjuvanted Microsphere Control.

### Survival After 100 PFU Challenge Active *versus* PBS Control

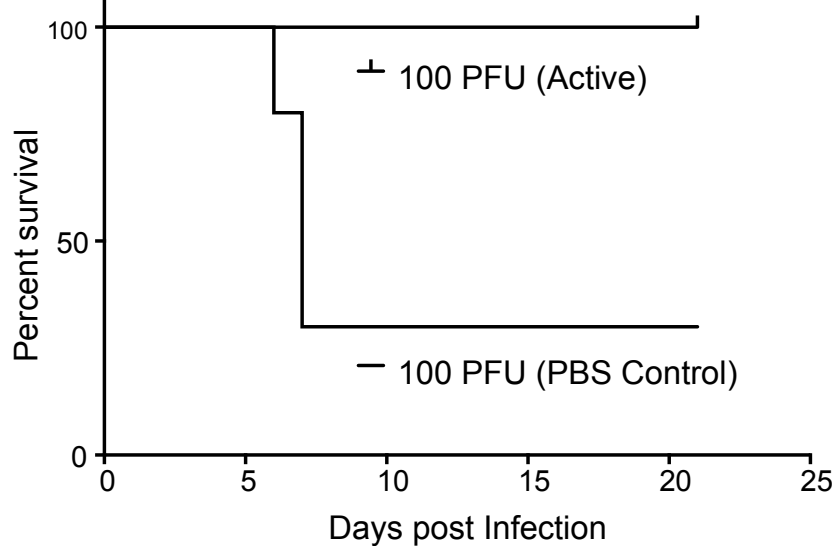

(b) Survival curve *versus* PBS buffer control.

Figure 1: The 100PFU PBS control survival curve **1b** is not statistically different from the 100PFU adjuvanted control survival curve **1a**. A chi square test results in a  $P = 0.37$  for (survived / dead)  $6/4$  (adjuvanted) versus  $3/7$  (PBS control).

### 100 PFU (Active Microspheres)

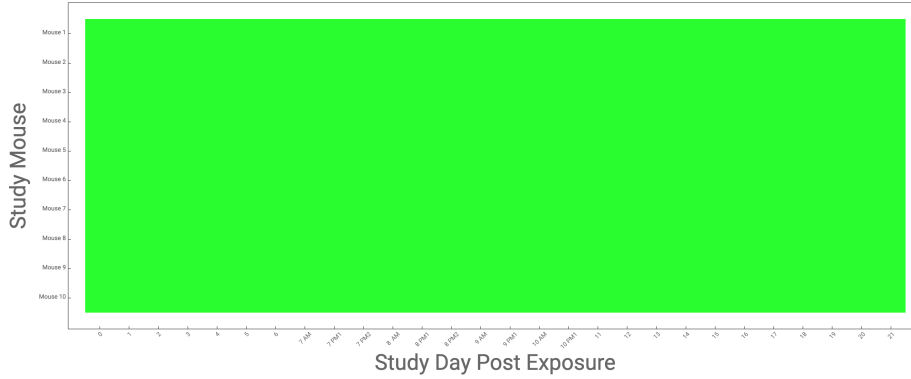

Figure 2: Clinical observations showing that no mice died in this group during the study, scored from 1 (healthy) to 4 (moribund) made post infection in control animals receiving PBS buffer via intraperitoneal injection 14 days before infection. The clinical scores described in Table 1 are shown using the following color scheme: 1 = GREEN, 2 = YELLOW, 3 = ORANGE and 4 = RED. A dead mouse is coded in black. The frequency of measurements was increased on post infection days 6-9 coinciding with the anticipated period of peak morbidity.

### 100 PFU (Adjuvanted Microsphere Control)

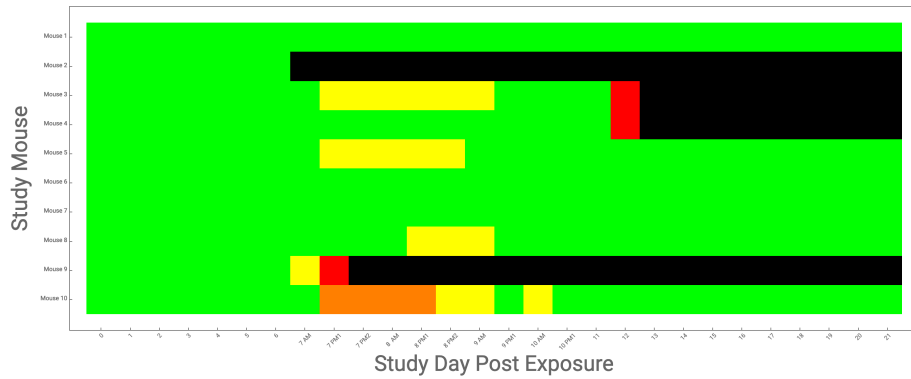

Figure 3: Clinical observations, scored from 1 (healthy) to 4 (moribund) made post infection in control animals receiving PBS buffer via intraperitoneal injection 14 days before infection. The clinical scores described in Table 1 are shown using the following color scheme: 1 = GREEN, 2 = YELLOW, 3 = ORANGE and 4 = RED. A dead mouse is coded in black. The frequency of measurements was increased on post infection days 6-9 coinciding with the anticipated period of peak morbidity.

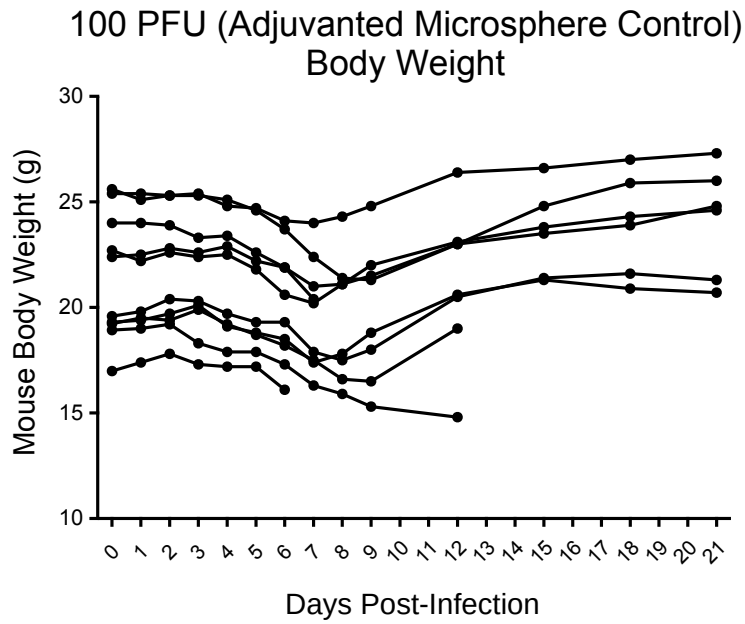

Figure 4: Daily weights were recorded post infection. Measurements for control animals, receiving adjuvanted microspheres 14 days before infection, are shown here.

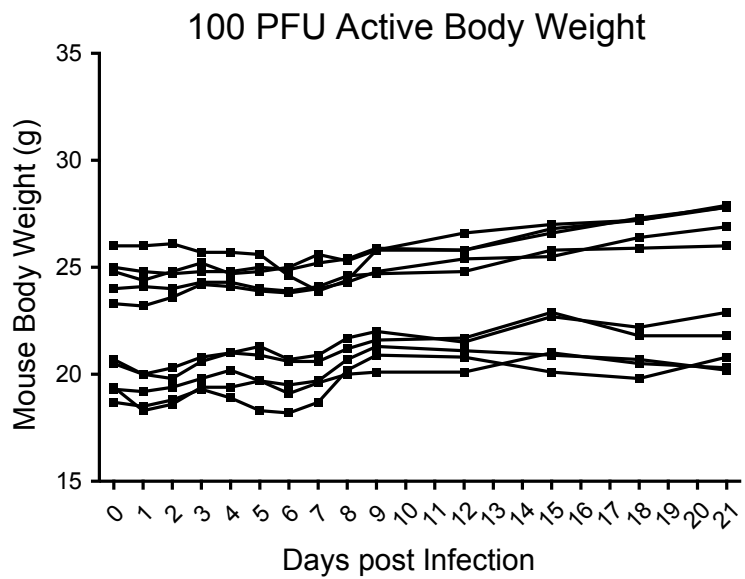

Figure 5: Daily weights were recorded post infection. Measurements for animals receiving active vaccine 14 days before infection, are shown here.

CLUSTAL multiple sequence alignment by MUSCLE (3.8)

```

Sudan_EBOV_NP          MDKRVGSGWALGGQSEVDLDYHKILTAGLSVQQGIVRQRVIPVYVWSDLEGIQCQHIIQAF
Zaire_EBOV_NP          MDSRPQKIMAPSLTESDMDYHKILTAGLSVQQGIVRQRVIPVYQVNNLEEICQLIIQAF
Bundibugyo_EBOV_NP    MDPRPIRTWMMHNTSEVEADYHKILTAGLSVQQGIVRQRRIIPVYQISNLEEVQCQLIIQAF
** * * * * * : * * * * * : * * * * * : * * * * * : * * * * *
. . . . . : . . . . . : . . . . . : . . . . . : . . . . .
* * * * * * * * * * * * * * * * * * * * * * * * * * * * * * * * *

```

Figure 6: NP44-52 has conserved residues across three strains of EBOV.



Computed HLA Binding Affinities for YQVNNLEEI

| Allele             | Median<br>pIC <sub>50nM</sub> | Consensus Score |
|--------------------|-------------------------------|-----------------|
| <b>HLA-A*02:06</b> | 5.8                           | 0.16            |
| <b>HLA-A*02:03</b> | 106                           | 2.4             |
| <b>HLA-A*02:01</b> | 198                           | 3.7             |
| HLA-B*15:01        | 791                           | 4.7             |
| HLA-A*23:01        | 1140                          | 2.1             |
| HLA-B*40:01        | 1140                          | 2.4             |
| HLA-A*68:02        | 5553                          | 23              |
| HLA-A*24:02        | 5664                          | 5.7             |
| HLA-B*53:01        | 8737                          | 15              |
| HLA-B*58:01        | 12128                         | 17              |
| HLA-B*51:01        | 13551                         | 6.3             |
| HLA-A*26:01        | 15442                         | 11              |
| HLA-A*32:01        | 17173                         | 22              |
| HLA-B*44:03        | 18798                         | 17              |
| HLA-B*35:01        | 19374                         | 35              |
| HLA-A*30:01        | 23549                         | 61              |
| HLA-B*44:02        | 27488                         | 20              |
| HLA-A*30:02        | 31424                         | 55              |

Table 2: Database-predicted HLA binding affinities for NP44-52 (YQVNNLEEI), the Class I peptide used in this study.

Computed H-2 Binding Affinities for YQVNNLEEI

| Allele                   | Median<br>pIC <sub>50nM</sub> | Consensus Score |
|--------------------------|-------------------------------|-----------------|
| <b>H-2-D<sup>b</sup></b> | 26                            | 0.20            |
| H-2-K <sup>d</sup>       | 5639                          | 7.0             |
| H-2-K <sup>b</sup>       | 13722                         | 32              |
| H-2-D <sup>d</sup>       | 21052                         | 23              |
| H-2-L <sup>d</sup>       | -                             | 41              |

Table 3: Database-predicted H-2 binding affinities for NP44-52 (YQVNNLEEI), the Class I peptide used in this study.

## Computed HLA-DR Binding Affinities for VKNEVNSFKAALSSLAKHG

| Allele                    | Start | 15-mer peptide  | Median<br>pIC <sub>50</sub> nM | Consensus Score |
|---------------------------|-------|-----------------|--------------------------------|-----------------|
| HLA-DRB1*01:01            | 5     | VNSFKAALSSLAKHG | 4.1                            | 0.28            |
| HLA-DRB1*09:01            | 5     | VNSFKAALSSLAKHG | 6.0                            | 0.010           |
| HLA-DRB1*04:05            | 4     | EVNSFKAALSSLAKH | 14                             | 0.19            |
| HLA-DRB5*01:01            | 5     | VNSFKAALSSLAKHG | 24                             | 1.8             |
| HLA-DQA1*05:01/DQB1*03:01 | 3     | NEVNSFKAALSSLAK | 24                             | 13              |
| HLA-DRB1*04:01            | 5     | VNSFKAALSSLAKHG | 25                             | 1.2             |
| HLA-DPA1*02:01/DPB1*14:01 | 4     | EVNSFKAALSSLAKH | 27                             | 4.7             |
| HLA-DRB3*02:02            | 4     | EVNSFKAALSSLAKH | 27                             | 0.080           |
| HLA-DRB1*07:01            | 2     | KNEVNSFKAALSSLA | 40                             | 4.7             |
| HLA-DRB1*11:01            | 5     | VNSFKAALSSLAKHG | 66                             | 4.3             |
| HLA-DRB1*15:01            | 3     | NEVNSFKAALSSLAK | 152                            | 3.4             |
| HLA-DRB1*08:02            | 3     | NEVNSFKAALSSLAK | 162                            | 1.4             |
| HLA-DQA1*01:02/DQB1*06:02 | 3     | NEVNSFKAALSSLAK | 167                            | 6.2             |
| HLA-DPA1*02:01/DPB1*01:01 | 4     | EVNSFKAALSSLAKH | 401                            | 26              |
| HLA-DRB1*12:01            | 5     | VNSFKAALSSLAKHG | 769                            | 8.8             |
| HLA-DPA1*03:01/DPB1*04:02 | 4     | EVNSFKAALSSLAKH | 773                            | 15              |
| HLA-DRB4*01:01            | 3     | NEVNSFKAALSSLAK | 903                            | 37              |
| HLA-DRB1*13:02            | 1     | VKNEVNSFKAALSSL | 1380                           | 28              |
| HLA-DRB1*03:01            | 2     | KNEVNSFKAALSSLA | 1498                           | 13              |
| HLA-DQA1*03:01/DQB1*03:02 | 1     | VKNEVNSFKAALSSL | 1680                           | 21              |
| HLA-DPA1*02:01/DPB1*05:01 | 5     | VNSFKAALSSLAKHG | 1811                           | 25              |
| HLA-DQA1*04:01/DQB1*04:02 | 4     | EVNSFKAALSSLAKH | 1951                           | 16              |
| HLA-DRB3*01:01            | 2     | KNEVNSFKAALSSLA | 1991                           | 21              |
| HLA-DPA1*01:03/DPB1*02:01 | 4     | EVNSFKAALSSLAKH | 2002                           | 26              |
| HLA-DPA1*01/DPB1*04:01    | 4     | EVNSFKAALSSLAKH | 2073                           | 31              |
| HLA-DQA1*05:01/DQB1*02:01 | 2     | KNEVNSFKAALSSLA | 3341                           | 32              |
| HLA-DQA1*01:01/DQB1*05:01 | 1     | VKNEVNSFKAALSSL | 3922                           | 29              |

Table 4: Database-predicted HLA binding affinities for VKNEVNSFKAALSSLAKHG, the Class II peptide used in this study.

Computed H2-I Binding Affinities for  
VKNEVNSFKAALSSLAKHG

| Allele                   | Start | 15-mer peptide  | Median<br>pIC <sub>50</sub> nM | Consensus Score |
|--------------------------|-------|-----------------|--------------------------------|-----------------|
| <b>H2-IA<sup>b</sup></b> | 4     | EVNSFKAALSSLAKH | 138                            | 1.4             |
| H2-IA <sup>d</sup>       | 5     | VNSFKAALSSLAKHG | 1069                           | 6.1             |
| H2-IE <sup>d</sup>       | 5     | VNSFKAALSSLAKHG | 5797                           | 35              |

Table 5: Database-predicted H2-I binding affinities for VKNEVNSFKAALSSLAKHG, the Class II peptide used in this study.

|              |                                                              |     |
|--------------|--------------------------------------------------------------|-----|
| QH062884     | QASSRSSRSRNSXRNSTPGSSRGTSPARMAGNGGDAALALLLLDRLNQLQESKMSGKGQQ | 240 |
| QIC50514     | QASSRSSRSRNSRNSTPGSNRGTSPARMAGNGGDAALALLLLDRLNQLQESKMSGKGQQ  | 240 |
| QIC50515     | QASSRSSRSRNSRNSTPGSNRGTSPARMAGNGGDAALALLLLDRLNQLQESKMSGKGQQ  | 240 |
| QH200406     | QASSRSSRSRNSLRNSTPGSSRGTSPARMAGNGGDAALALLLLDRLNQLQESKMSGKGQQ | 240 |
| QHW06046     | QASSRSSRSRNSLRNSTPGSSRGTSPARMAGNGGDAALALLLLDRLNQLQESKMSGKGQQ | 240 |
| QHW06056     | QASSRSSRSRNSLRNSTPGSSRGTSPARMAGNGGDAALALLLLDRLNQLQESKMSGKGQQ | 240 |
| QIA98602     | QASSRSSRSRNSRNSTPGSSRGTSPARMAGNGGDAALALLLLDRLNQLQESKMSGKGQQ  | 240 |
| QIA20052     | QASSRSSRSRNSRNSTPGSSRGTSPARMAGNGGDAALALLLLDRLNQLQESKMSGKGQQ  | 240 |
| QIA98613     | QASSRSSRSRNSRNSTPGSSRGTSPARMAGNGGDAALALLLLDRLNQLQESKMSGKGQQ  | 240 |
| QH287599     | QASSRSSRSRNSRNSTPGSSRGTSPARMAGNGGDAALALLLLDRLNQLQESKMSGKGQQ  | 240 |
| QH287589     | QASSRSSRSRNSRNSTPGSSRGTSPARMAGNGGDAALALLLLDRLNQLQESKMSGKGQQ  | 240 |
| QH082471     | QASSRSSRSRNSRNSTPGSSRGTSPARMAGNGGDAALALLLLDRLNQLQESKMSGKGQQ  | 240 |
| QHR63278     | QASSRSSRSRNSRNSTPGSSRGTSPARMAGNGGDAALALLLLDRLNQLQESKMSGKGQQ  | 240 |
| QHR63258     | QASSRSSRSRNSRNSTPGSSRGTSPARMAGNGGDAALALLLLDRLNQLQESKMSGKGQQ  | 240 |
| QH200365     | QASSRSSRSRNSRNSTPGSSRGTSPARMAGNGGDAALALLLLDRLNQLQESKMSGKGQQ  | 240 |
| BCA25661     | QASSRSSRSRNSRNSTPGSSRGTSPARMAGNGGDAALALLLLDRLNQLQESKMSGKGQQ  | 240 |
| QH200386     | QASSRSSRSRNSRNSTPGSSRGTSPARMAGNGGDAALALLLLDRLNQLQESKMSGKGQQ  | 240 |
| QH200396     | QASSRSSRSRNSRNSTPGSSRGTSPARMAGNGGDAALALLLLDRLNQLQESKMSGKGQQ  | 240 |
| BCA25671     | QASSRSSRSRNSRNSTPGSSRGTSPARMAGNGGDAALALLLLDRLNQLQESKMSGKGQQ  | 240 |
| BCA25681     | QASSRSSRSRNSRNSTPGSSRGTSPARMAGNGGDAALALLLLDRLNQLQESKMSGKGQQ  | 240 |
| QHU36851     | QASSRSSRSRNSRNSTPGSSRGTSPARMAGNGGDAALALLLLDRLNQLQESKMSGKGQQ  | 240 |
| QH062110     | QASSRSSRSRNSRNSTPGSSRGTSPARMAGNGGDAALALLLLDRLNQLQESKMSGKGQQ  | 240 |
| QH071970     | QASSRSSRSRNSRNSTPGSSRGTSPARMAGNGGDAALALLLLDRLNQLQESKMSGKGQQ  | 240 |
| QH062115     | QASSRSSRSRNSRNSTPGSSRGTSPARMAGNGGDAALALLLLDRLNQLQESKMSGKGQQ  | 240 |
| QH060601     | QASSRSSRSRNSRNSTPGSSRGTSPARMAGNGGDAALALLLLDRLNQLQESKMSGKGQQ  | 240 |
| QHU36871     | QASSRSSRSRNSRNSTPGSSRGTSPARMAGNGGDAALALLLLDRLNQLQESKMSGKGQQ  | 240 |
| QHW06066     | QASSRSSRSRNSRNSTPGSSRGTSPARMAGNGGDAALALLLLDRLNQLQESKMSGKGQQ  | 240 |
| QHN73817     | QASSRSSRSRNSRNSTPGSSRGTSPARMAGNGGDAALALLLLDRLNQLQESKMSGKGQQ  | 240 |
| QHU79181     | QASSRSSRSRNSRNSTPGSSRGTSPARMAGNGGDAALALLLLDRLNQLQESKMSGKGQQ  | 240 |
| QHU79201     | QASSRSSRSRNSRNSTPGSSRGTSPARMAGNGGDAALALLLLDRLNQLQESKMSGKGQQ  | 240 |
| QHU36831     | QASSRSSRSRNSRNSTPGSSRGTSPARMAGNGGDAALALLLLDRLNQLQESKMSGKGQQ  | 240 |
| QHU36841     | QASSRSSRSRNSRNSTPGSSRGTSPARMAGNGGDAALALLLLDRLNQLQESKMSGKGQQ  | 240 |
| QHU36861     | QASSRSSRSRNSRNSTPGSSRGTSPARMAGNGGDAALALLLLDRLNQLQESKMSGKGQQ  | 240 |
| QHU79211     | QASSRSSRSRNSRNSTPGSSRGTSPARMAGNGGDAALALLLLDRLNQLQESKMSGKGQQ  | 240 |
| QIC50512     | QASSRSSRSRNSRNSTPGSSRGTSPARMAGNGGDAALALLLLDRLNQLQESKMSGKGQQ  | 240 |
| QHR63288     | QASSRSSRSRNSRNSTPGSSRGTSPARMAGNGGDAALALLLLDRLNQLQESKMSGKGQQ  | 240 |
| QIC50508     | QASSRSSRSRNSRNSTPGSSRGTSPARMAGNGGDAALALLLLDRLNQLQESKMSGKGQQ  | 240 |
| QIC50513     | QASSRSSRSRNSRNSTPGSSRGTSPARMAGNGGDAALALLLLDRLNQLQESKMSGKGQQ  | 240 |
| QIC50516     | QASSRSSRSRNSRNSTPGSSRGTSPARMAGNGGDAALALLLLDRLNQLQESKMSGKGQQ  | 240 |
| QIC50507     | QASSRSSRSRNSRNSTPGSSRGTSPARMAGNGGDAALALLLLDRLNQLQESKMSGKGQQ  | 240 |
| QIC50509     | QASSRSSRSRNSRNSTPGSSRGTSPARMAGNGGDAALALLLLDRLNQLQESKMSGKGQQ  | 240 |
| QIC50511     | QASSRSSRSRNSRNSTPGSSRGTSPARMAGNGGDAALALLLLDRLNQLQESKMSGKGQQ  | 240 |
| QHD43423     | QASSRSSRSRNSRNSTPGSSRGTSPARMAGNGGDAALALLLLDRLNQLQESKMSGKGQQ  | 240 |
| QIB84680     | QASSRSSRSRNSRNSTPGSSRGTSPARMAGNGGDAALALLLLDRLNQLQESKMSGKGQQ  | 240 |
| QIC50510     | QASSRSSRSRNSRNSTPGSSRGTSPARMAGNGGDAALALLLLDRLNQLQESKMSGKGQQ  | 240 |
| QH071980     | QASSRSSRSRNSRNSTPGSSRGTSPARMAGNGGDAALALLLLDRLNQLQESKMSGKGQQ  | 240 |
| QHN73802     | QASSRSSRSRNSRNSTPGSSRGTSPARMAGNGGDAALALLLLDRLNQLQESKMSGKGQQ  | 240 |
| QHR84456     | QASSRSSRSRNSRNSTPGSSRGTSPARMAGNGGDAALALLLLDRLNQLQESKMSGKGQQ  | 240 |
| QHR63298     | QASSRSSRSRNSRNSTPGSSRGTSPARMAGNGGDAALALLLLDRLNQLQESKMSGKGQQ  | 240 |
| YP_009724397 | QASSRSSRSRNSRNSTPGSSRGTSPARMAGNGGDAALALLLLDRLNQLQESKMSGKGQQ  | 240 |
| QHR63268     | QASSRSSRSRNSRNSTPGSSRGTSPARMAGNGGDAALALLLLDRLNQLQESKMSGKGQQ  | 240 |
| QIC53221     | QASSRSSRSRNSRNSTPGSSRGTSPARMAGNGGDAALALLLLDRLNQLQESKMSGKGQQ  | 240 |
| QIC53211     | QASSRSSRSRNSRNSTPGSSRGTSPARMAGNGGDAALALLLLDRLNQLQESKMSGKGQQ  | 240 |
| BCA25651     | QASSRSSRSRNSRNSTPGSSRGTSPARMAGNGGDAALALLLLDRLNQLQESKMSGKGQQ  | 240 |

\*\*\*\*\*  
\*\*\*\*\*  
\*\*\*\*\*

Figure 7: Part 1 of 2. Sequences from 54 subjects with COVID-19 were found to have highly conserved nucleocapsid peptide sequences from positions 1-419 with the exception of three positions. At position 194, three individual sequences differ with non-conserved amino acid residues and one unknown amino acid. At position 202, a partially conserved amino acid variant is seen in two samples. At position 344, one non-conserved amino acid is present, however, this sample used a laboratory host cell line where only one of 4 replicates displayed this non-conserved amino acid substitution. These three mutation positions are colored according to the Clustal X color scheme.

|                                                             |                                                             |     |
|-------------------------------------------------------------|-------------------------------------------------------------|-----|
| QH062884                                                    | WPQIAQFAPSASAFFGMSRIGMEVTPSGTWLTYTGAIKLDKDPNFKDQVILLNKHIDAY | 360 |
| QIC50514                                                    | WPQIAQFAPSASAFFGMSRIGMEVTPSGTWLTYTGAIKLDKDPNFKDQVILLNKHIDAY | 360 |
| QIC50515                                                    | WPQIAQFAPSASAFFGMSRIGMEVTPSGTWLTYTGAIKLDKDPNFKDQVILLNKHIDAY | 360 |
| QH200406                                                    | WPQIAQFAPSASAFFGMSRIGMEVTPSGTWLTYTGAIKLDKDPNFKDQVILLNKHIDAY | 360 |
| QHW06046                                                    | WPQIAQFAPSASAFFGMSRIGMEVTPSGTWLTYTGAIKLDKDPNFKDQVILLNKHIDAY | 360 |
| QHW06056                                                    | WPQIAQFAPSASAFFGMSRIGMEVTPSGTWLTYTGAIKLDKDPNFKDQVILLNKHIDAY | 360 |
| QIA98602                                                    | WPQIAQFAPSASAFFGMSRIGMEVTPSGTWLTYTGAIKLDKDPNFKDQVILLNKHIDAY | 360 |
| QIA20052                                                    | WPQIAQFAPSASAFFGMSRIGMEVTPSGTWLTYTGAIKLDKDPNFKDQVILLNKHIDAY | 360 |
| QIA98613                                                    | WPQIAQFAPSASAFFGMSRIGMEVTPSGTWLTYTGAIKLDKDPNFKDQVILLNKHIDAY | 360 |
| QH287599                                                    | WPQIAQFAPSASAFFGMSRIGMEVTPSGTWLTYTGAIKLDKDPNFKDQVILLNKHIDAY | 360 |
| QH287589                                                    | WPQIAQFAPSASAFFGMSRIGMEVTPSGTWLTYTGAIKLDKDPNFKDQVILLNKHIDAY | 360 |
| QH082471                                                    | WPQIAQFAPSASAFFGMSRIGMEVTPSGTWLTYTGAIKLDKDPNFKDQVILLNKHIDAY | 360 |
| QHR63278                                                    | WPQIAQFAPSASAFFGMSRIGMEVTPSGTWLTYTGAIKLDKDPNFKDQVILLNKHIDAY | 360 |
| QHR63258                                                    | WPQIAQFAPSASAFFGMSRIGMEVTPSGTWLTYTGAIKLDKDPNFKDQVILLNKHIDAY | 360 |
| WPQIAQFAPSASAFFGMSRIGMEVTPSGTWLTYTGAIKLDKDPNFKDQVILLNKHIDAY |                                                             | 360 |
| BCA25661                                                    | WPQIAQFAPSASAFFGMSRIGMEVTPSGTWLTYTGAIKLDKDPNFKDQVILLNKHIDAY | 360 |
| QHZ00386                                                    | WPQIAQFAPSASAFFGMSRIGMEVTPSGTWLTYTGAIKLDKDPNFKDQVILLNKHIDAY | 360 |
| QHZ00396                                                    | WPQIAQFAPSASAFFGMSRIGMEVTPSGTWLTYTGAIKLDKDPNFKDQVILLNKHIDAY | 360 |
| BCA25671                                                    | WPQIAQFAPSASAFFGMSRIGMEVTPSGTWLTYTGAIKLDKDPNFKDQVILLNKHIDAY | 360 |
| BCA25681                                                    | WPQIAQFAPSASAFFGMSRIGMEVTPSGTWLTYTGAIKLDKDPNFKDQVILLNKHIDAY | 360 |
| QHU36851                                                    | WPQIAQFAPSASAFFGMSRIGMEVTPSGTWLTYTGAIKLDKDPNFKDQVILLNKHIDAY | 360 |
| WPQIAQFAPSASAFFGMSRIGMEVTPSGTWLTYTGAIKLDKDPNFKDQVILLNKHIDAY |                                                             | 360 |
| QH062110                                                    | WPQIAQFAPSASAFFGMSRIGMEVTPSGTWLTYTGAIKLDKDPNFKDQVILLNKHIDAY | 360 |
| QH071970                                                    | WPQIAQFAPSASAFFGMSRIGMEVTPSGTWLTYTGAIKLDKDPNFKDQVILLNKHIDAY | 360 |
| QH062115                                                    | WPQIAQFAPSASAFFGMSRIGMEVTPSGTWLTYTGAIKLDKDPNFKDQVILLNKHIDAY | 360 |
| QH060601                                                    | WPQIAQFAPSASAFFGMSRIGMEVTPSGTWLTYTGAIKLDKDPNFKDQVILLNKHIDAY | 360 |
| QHU36871                                                    | WPQIAQFAPSASAFFGMSRIGMEVTPSGTWLTYTGAIKLDKDPNFKDQVILLNKHIDAY | 360 |
| QHW06066                                                    | WPQIAQFAPSASAFFGMSRIGMEVTPSGTWLTYTGAIKLDKDPNFKDQVILLNKHIDAY | 360 |
| QHN73817                                                    | WPQIAQFAPSASAFFGMSRIGMEVTPSGTWLTYTGAIKLDKDPNFKDQVILLNKHIDAY | 360 |
| QHU79181                                                    | WPQIAQFAPSASAFFGMSRIGMEVTPSGTWLTYTGAIKLDKDPNFKDQVILLNKHIDAY | 360 |
| QHU79201                                                    | WPQIAQFAPSASAFFGMSRIGMEVTPSGTWLTYTGAIKLDKDPNFKDQVILLNKHIDAY | 360 |
| QHU36831                                                    | WPQIAQFAPSASAFFGMSRIGMEVTPSGTWLTYTGAIKLDKDPNFKDQVILLNKHIDAY | 360 |
| QHU36841                                                    | WPQIAQFAPSASAFFGMSRIGMEVTPSGTWLTYTGAIKLDKDPNFKDQVILLNKHIDAY | 360 |
| QHU36861                                                    | WPQIAQFAPSASAFFGMSRIGMEVTPSGTWLTYTGAIKLDKDPNFKDQVILLNKHIDAY | 360 |
| QHU79211                                                    | WPQIAQFAPSASAFFGMSRIGMEVTPSGTWLTYTGAIKLDKDPNFKDQVILLNKHIDAY | 360 |
| QIC50512                                                    | WPQIAQFAPSASAFFGMSRIGMEVTPSGTWLTYTGAIKLDKDPNFKDQVILLNKHIDAY | 360 |
| QHR63288                                                    | WPQIAQFAPSASAFFGMSRIGMEVTPSGTWLTYTGAIKLDKDPNFKDQVILLNKHIDAY | 360 |
| QIC50508                                                    | WPQIAQFAPSASAFFGMSRIGMEVTPSGTWLTYTGAIKLDKDPNFKDQVILLNKHIDAY | 360 |
| QIC50513                                                    | WPQIAQFAPSASAFFGMSRIGMEVTPSGTWLTYTGAIKLDKDPNFKDQVILLNKHIDAY | 360 |
| QIC50516                                                    | WPQIAQFAPSASAFFGMSRIGMEVTPSGTWLTYTGAIKLDKDPNFKDQVILLNKHIDAY | 360 |
| QIC50507                                                    | WPQIAQFAPSASAFFGMSRIGMEVTPSGTWLTYTGAIKLDKDPNFKDQVILLNKHIDAY | 360 |
| QIC50509                                                    | WPQIAQFAPSASAFFGMSRIGMEVTPSGTWLTYTGAIKLDKDPNFKDQVILLNKHIDAY | 360 |
| QIC50511                                                    | WPQIAQFAPSASAFFGMSRIGMEVTPSGTWLTYTGAIKLDKDPNFKDQVILLNKHIDAY | 360 |
| QHD43423                                                    | WPQIAQFAPSASAFFGMSRIGMEVTPSGTWLTYTGAIKLDKDPNFKDQVILLNKHIDAY | 360 |
| QIB84680                                                    | WPQIAQFAPSASAFFGMSRIGMEVTPSGTWLTYTGAIKLDKDPNFKDQVILLNKHIDAY | 360 |
| QIC50510                                                    | WPQIAQFAPSASAFFGMSRIGMEVTPSGTWLTYTGAIKLDKDPNFKDQVILLNKHIDAY | 360 |
| QH071980                                                    | WPQIAQFAPSASAFFGMSRIGMEVTPSGTWLTYTGAIKLDKDPNFKDQVILLNKHIDAY | 360 |
| QHN73802                                                    | WPQIAQFAPSASAFFGMSRIGMEVTPSGTWLTYTGAIKLDKDPNFKDQVILLNKHIDAY | 360 |
| QHR84456                                                    | WPQIAQFAPSASAFFGMSRIGMEVTPSGTWLTYTGAIKLDKDPNFKDQVILLNKHIDAY | 360 |
| QHR63298                                                    | WPQIAQFAPSASAFFGMSRIGMEVTPSGTWLTYTGAIKLDKDPNFKDQVILLNKHIDAY | 360 |
| YP_009724397                                                | WPQIAQFAPSASAFFGMSRIGMEVTPSGTWLTYTGAIKLDKDPNFKDQVILLNKHIDAY | 360 |
| QHR63268                                                    | WPQIAQFAPSASAFFGMSRIGMEVTPSGTWLTYTGAIKLDKDPNFKDQVILLNKHIDAY | 360 |
| QIC53221                                                    | WPQIAQFAPSASAFFGMSRIGMEVTPSGTWLTYTGAIKLDKDPNFKDQVILLNKHIDAY | 360 |
| QIC53211                                                    | WPQIAQFAPSASAFFGMSRIGMEVTPSGTWLTYTGAIKLDKDPNFKDQVILLNKHIDAY | 360 |
| BCA25651                                                    | WPQIAQFAPSASAFFGMSRIGMEVTPSGTWLTYTGAIKLDKDPNFKDQVILLNKHIDAY | 360 |
| *****                                                       |                                                             |     |

Figure 8: Part 2 of 2. Sequences from 54 subjects with COVID-19 were found to have highly conserved nucleocapsid peptide sequences from positions 1-419 with the exception of three positions. At position 194, three individual sequences differ with non-conserved amino acid residues and one unknown amino acid. At position 202, a partially conserved amino acid variant is seen in two samples. At position 344, one non-conserved amino acid is present, however, this sample used a laboratory host cell line where only one of 4 replicates displayed this non-conserved amino acid substitution. These three mutation positions are colored according to the Clustal X color scheme.

COVID-19 Nucleocapsid Peptides with Associated Predicted HLA  
Restricted Binding Affinities (1/4)

| Peptide     | Start<br>Position | Allele      | NetMHC 4.0<br>pIC <sub>50</sub> nM | NetMHCpan 4.0<br>pIC <sub>50</sub> nM | SARS<br>Same? |
|-------------|-------------------|-------------|------------------------------------|---------------------------------------|---------------|
| LSPRWYFYFYY | 104               | HLA-A*01:01 | 48.64                              | 76.9                                  | YES           |
| LLDRLNQL    | 222               | HLA-A*02:01 | 14.81                              | 11.3                                  | YES           |
| GMSRIGMEV   | 316               | HLA-A*02:01 | 50.61                              | 48.1                                  | YES           |
| KTFPPTEPK   | 361               | HLA-A*03:01 | 20.8                               | 18.8                                  | YES           |
| KSAAEASKK   | 249               | HLA-A*03:01 | 116.22                             | 139.4                                 | YES           |
| LIRQGTDYK   | 291               | HLA-A*03:01 | 274.69                             | 137.5                                 | YES           |
| ASAFFGMSR   | 311               | HLA-A*03:01 | 292.41                             | 285.3                                 | YES           |
| QLESKMSGK   | 229               | HLA-A*03:01 | 322.41                             | 751                                   | NO            |
| FTALTQHGK   | 53                | HLA-A*03:01 | 788.84                             | 345.5                                 | YES           |
| KTFPPTEPK   | 361               | HLA-A*11:01 | 6.28                               | 7.7                                   | YES           |
| ASAFFGMSR   | 311               | HLA-A*11:01 | 14.4                               | 15.3                                  | YES           |
| FTALTQHGK   | 53                | HLA-A*11:01 | 127.28                             | 44.9                                  | YES           |
| KSAAEASKK   | 249               | HLA-A*11:01 | 76.73                              | 62.2                                  | YES           |
| AGLPYGANK   | 119               | HLA-A*11:01 | 240.23                             | 157.5                                 | NO            |
| LIRQGTDYK   | 291               | HLA-A*11:01 | 984.82                             | 160.6                                 | YES           |
| LSPRWYFYFYY | 104               | HLA-A*11:01 | 253.34                             | 492.8                                 | YES           |
| TQALPQRQK   | 379               | HLA-A*11:01 | 740.66                             | 415.1                                 | NO            |
| QQQGQTVTK   | 240               | HLA-A*11:01 | 428.26                             | 470.3                                 | YES           |
| KHIDAYKTF   | 355               | HLA-A*23:01 | 134.12                             | 778.7                                 | YES           |
| YYRRATRRRI  | 86                | HLA-A*23:01 | 151.38                             | 366.6                                 | NO            |
| TWLTYTGAI   | 329               | HLA-A*23:01 | 24164.38                           | 282.1                                 | NO            |
| KHWPQIAQF   | 299               | HLA-A*23:01 | 317.71                             | 313.7                                 | YES           |
| KAYNVTQAF   | 266               | HLA-A*23:01 | 341.14                             | 602.3                                 | NO            |
| YYRRATRRRI  | 86                | HLA-A*24:02 | 74.89                              | 322                                   | NO            |

Table 6: This set of 53 unique peptides (part 1 of 4) achieves > 95% world-wide population coverage. The starting position is within the nucleocapsid. Peptides chosen with binding affinity predictions less than 500nm via NetMHC 4.0 or NetMHCpan 4.0. Peptide sequences colored in red have literature references as known *in-vitro* binders to the predicted allele match (see text).

COVID-19 Nucleocapsid Peptides with Associated Predicted HLA  
Restricted Binding Affinities (2/4)

| Peptide          | Start<br>Position | Allele             | NetMHC 4.0<br>pIC <sub>50</sub> nM | NetMHCpan 4.0<br>pIC <sub>50</sub> nM | SARS<br>Same? |
|------------------|-------------------|--------------------|------------------------------------|---------------------------------------|---------------|
| FAPSASAFF        | 307               | HLA-A*24:02        | 422.31                             | 847.7                                 | YES           |
| NTASWFTAL        | 48                | HLA-A*26:01        | 1113.04                            | 122.6                                 | YES           |
| ELIRQGTDY        | 290               | HLA-A*26:01        | 652.8                              | 327.8                                 | NO            |
| FAPSASAFF        | 307               | HLA-A*26:01        | 349.57                             | 606.6                                 | YES           |
| IGYYRRATR        | 84                | HLA-A*33:03        | N/A                                | 57.8                                  | YES           |
| NVTQAFGRR        | 269               | HLA-A*33:03        | N/A                                | 62.5                                  | YES           |
| ASAFFGMSR        | 311               | HLA-A*33:03        | N/A                                | 149.3                                 | YES           |
| QASSRSSSR        | 181               | HLA-A*33:03        | N/A                                | 163.9                                 | YES           |
| YNVTQAFGR        | 268               | HLA-A*33:03        | N/A                                | 189.1                                 | YES           |
| GYRRATR          | 85                | HLA-A*33:03        | N/A                                | 359.4                                 | YES           |
| SSRSSRSR         | 183               | HLA-A*33:03        | N/A                                | 395.3                                 | YES           |
| <b>FPRGQGVPI</b> | 66                | <b>HLA-B*07:02</b> | 3.82                               | 4.7                                   | YES           |
| KPRQKRTAT        | 257               | HLA-B*07:02        | 4.42                               | 18.8                                  | YES           |
| SPRWYFYYL        | 105               | HLA-B*07:02        | 6.32                               | 15.3                                  | YES           |
| RIRGGDKM         | 93                | HLA-B*07:02        | 149.86                             | 173                                   | NO            |
| NPANNAIV         | 150               | HLA-B*07:02        | 184.8                              | 569.3                                 | NO            |
| LPNNTASWF        | 45                | HLA-B*07:02        | 244.3                              | 334                                   | YES           |
| SPRWYFYYL        | 105               | HLA-B*08:01        | 13.77                              | 42.1                                  | YES           |
| LLDRLNQL         | 222               | HLA-B*08:01        | 125.72                             | 136.8                                 | YES           |
| <b>FPRGQGVPI</b> | 66                | <b>HLA-B*08:01</b> | 245.35                             | 368.3                                 | YES           |
| KPRQKRTAT        | 257               | HLA-B*08:01        | 364.72                             | 432.6                                 | YES           |
| KAYNVTQAF        | 266               | HLA-B*15:01        | 40.35                              | 19                                    | NO            |
| LLNKHIDAY        | 352               | HLA-B*15:01        | 33.04                              | 32.5                                  | YES           |

Table 7: This set of 53 unique peptides (part 2 of 4) achieves > 95% world-wide population coverage. The starting position is within the nucleocapsid. Peptides chosen with binding affinity predictions less than 500nm via NetMHC 4.0 or NetMHCpan 4.0. Peptide sequences colored in red have literature references as known *in-vitro* binders to the predicted allele match (see text).



COVID-19 Nucleocapsid Peptides with Associated Predicted HLA  
Restricted Binding Affinities (3/4)

| Peptide   | Start<br>Position | Allele      | NetMHC 4.0<br>pIC <sub>50</sub> nM | NetMHCpan 4.0<br>pIC <sub>50</sub> nM | SARS<br>Same? |
|-----------|-------------------|-------------|------------------------------------|---------------------------------------|---------------|
| LQLPQGTTL | 159               | HLA-B*15:01 | 105.55                             | 229.8                                 | YES           |
| FAPSASAFF | 307               | HLA-B*15:01 | 213.11                             | 281.9                                 | YES           |
| FSKQLQQSM | 403               | HLA-B*15:01 | 219.07                             | 286                                   | NO            |
| RLNQLESKM | 226               | HLA-B*15:01 | 1496.11                            | 490.3                                 | NO            |
| QFAPSASAF | 306               | HLA-B*15:01 | 493.85                             | 700.3                                 | YES           |
| RRIRGGDGK | 92                | HLA-B*27:05 | 65.94                              | 72.5                                  | NO            |
| RRATRRIRG | 88                | HLA-B*27:05 | 253.64                             | 787.8                                 | NO            |
| QRNAPRITF | 9                 | HLA-B*27:05 | 560.56                             | 262.1                                 | NO            |
| YRRATRRIR | 87                | HLA-B*27:05 | 415.31                             | 597.7                                 | NO            |
| NTASWFTAL | 48                | HLA-B*39:01 | 47.87                              | 353.3                                 | YES           |
| KKADETQAL | 374               | HLA-B*39:01 | 137.43                             | 926.4                                 | NO            |
| LQLPQGTTL | 159               | HLA-B*39:01 | 238.19                             | 228.7                                 | YES           |
| TRNPANNA  | 148               | HLA-B*39:01 | 406.62                             | 818.3                                 | NO            |
| MEVTPSGTW | 322               | HLA-B*44:02 | 11.48                              | 14.2                                  | YES           |
| LPNNTASWF | 45                | HLA-B*53:01 | 19.03                              | 25.7                                  | YES           |
| TPSGTWLFY | 325               | HLA-B*53:01 | 26.99                              | 79                                    | YES           |
| LPAADLDDF | 395               | HLA-B*53:01 | 193.75                             | 74.8                                  | NO            |
| FAPSASAFF | 307               | HLA-B*53:01 | 1164.6                             | 317.4                                 | YES           |
| GANKDGIW  | 124               | HLA-B*53:01 | 320.56                             | 1015.8                                | NO            |
| KAYNVTQAF | 266               | HLA-B*58:01 | 12.51                              | 17.7                                  | NO            |
| GANKDGIW  | 124               | HLA-B*58:01 | 158.07                             | 35.3                                  | NO            |
| KMKDLSRW  | 100               | HLA-B*58:01 | 83.99                              | 99.2                                  | NO            |
| LSPRWYFYY | 104               | HLA-B*58:01 | 359.42                             | 430.6                                 | YES           |
| KAYNVTQAF | 266               | HLA-C*03:04 | N/A                                | 12.7                                  | NO            |

Table 8: This set of 53 unique peptides (part 3 of 4) achieves > 95% world-wide population coverage. The starting position is within the nucleocapsid. Peptides chosen with binding affinity predictions less than 500nm via NetMHC 4.0 or NetMHCpan 4.0. Peptide sequences colored in red have literature references as known *in-vitro* binders to the predicted allele match (see text).

COVID-19 nucleocapsid Peptides with Associated Predicted HLA  
Restricted Binding Affinities (4/4)

| Peptide   | Start<br>Position | Allele      | NetMHC 4.0<br>pIC <sub>50</sub> nM | NetMHCpan 4.0<br>pIC <sub>50</sub> nM | SARS<br>Same? |
|-----------|-------------------|-------------|------------------------------------|---------------------------------------|---------------|
| FAPSASAFF | 307               | HLA-C*03:04 | N/A                                | 41.4                                  | YES           |
| LTYTGAIKL | 331               | HLA-C*03:04 | N/A                                | 44.8                                  | NO            |
| NTASWFTAL | 48                | HLA-C*03:04 | N/A                                | 58.8                                  | YES           |
| SAFFGMSRI | 312               | HLA-C*03:04 | N/A                                | 68                                    | YES           |
| LQLPQGTTL | 159               | HLA-C*03:04 | N/A                                | 99.5                                  | YES           |
| FSKQLQQSM | 403               | HLA-C*03:04 | N/A                                | 149.9                                 | NO            |
| FPRGQGVPI | 66                | HLA-C*03:04 | N/A                                | 434.9                                 | YES           |
| YRRATRRIR | 87                | HLA-C*07:01 | 112.27                             | 8786.2                                | NO            |
| QRNAPRITF | 9                 | HLA-C*07:01 | 1337.36                            | 198.9                                 | NO            |
| YYRRATRRI | 86                | HLA-C*07:01 | 254.32                             | 957.2                                 | NO            |
| LKFPRGQGV | 64                | HLA-C*07:01 | 446.18                             | 1633.3                                | NO            |
| QRNAPRITF | 9                 | HLA-C*07:02 | 261.17                             | 237.8                                 | NO            |
| YYRRATRRI | 86                | HLA-C*07:02 | 6229.2                             | 242.2                                 | NO            |
| FAPSASAFF | 307               | HLA-C*07:02 | 16893.5                            | 347.4                                 | YES           |
| KHWPQIAQF | 299               | HLA-C*07:02 | 430.68                             | 971.3                                 | YES           |
| NFKDQVILL | 345               | HLA-C*07:02 | 29905.43                           | 462.1                                 | NO            |
| KAYNVTQAF | 266               | HLA-C*07:02 | 668.01                             | 477                                   | NO            |
| FAPSASAFF | 307               | HLA-C*08:01 | N/A                                | 280.1                                 | YES           |
| KAYNVTQAF | 266               | HLA-C*08:01 | N/A                                | 412.2                                 | NO            |

Table 9: This set of 53 unique peptides (part 4 of 4) achieves > 95% world-wide population coverage. The starting position is within the nucleocapsid. Peptides chosen with binding affinity predictions less than 500nm via NetMHC 4.0 or NetMHCpan 4.0. Peptide sequences colored in red have literature references as known *in-vitro* binders to the predicted allele match (see text).

### Projected World-Wide Population Coverage for a COVID-19 Peptide Vaccine Targeting 9mer Peptides on Nucleocapsid Proteins

| Minimum Epitope Matches / Allele / Person | % Projected Coverage | Cumulative % Population Coverage |
|-------------------------------------------|----------------------|----------------------------------|
| 1                                         | 18.14                | 97.27                            |
| 2                                         | 35.05                | 79.13                            |
| 3                                         | 29.7                 | 44.08                            |
| 4                                         | 12.02                | 14.37                            |
| 5                                         | 2.2                  | 2.35                             |
| 6                                         | 0.15                 | 0.15                             |

Table 10: Data showing projected HLA world-wide population coverage for a COVID-19 vaccine using the 16 epitopes listed in Tables 6 through 9. If we assume a least one HLA match per peptide capable of producing a clinically relevant immune response in a person, we can achieve 97.27% global population coverage with a 16 Class I peptide CTL vaccine.

### Projected China-Specific Population Coverage for a COVID-19 Peptide Vaccine Targeting 9mer Peptides on Nucleocapsid Proteins

| Minimum Epitope Matches / Allele / Person | % Projected Coverage | Cumulative % Population Coverage |
|-------------------------------------------|----------------------|----------------------------------|
| 1                                         | 26.02                | 94.39                            |
| 2                                         | 38.01                | 68.37                            |
| 3                                         | 23.14                | 30.36                            |
| 4                                         | 6.42                 | 7.22                             |
| 5                                         | 0.77                 | 0.8                              |
| 6                                         | 0.03                 | 0.03                             |

Table 11: If we take the assumptions made in the global projected population coverage Table 10 now assuming a China-specific HLA distribution, we still can achieve 94.39% population coverage

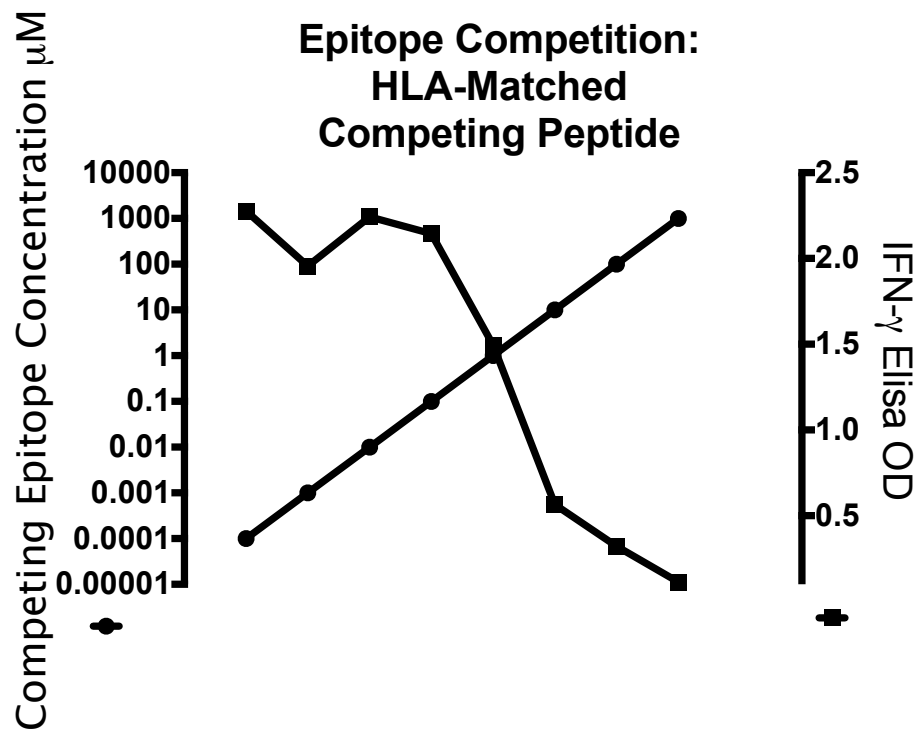

Figure 9: Simultaneous *in-vitro* incubation of two HLA matched epitopes to human PBMCs from an individual vaccinated against tetanus toxin. *IFN* -  $\gamma$  release in response to a Class I epitope from tetanus virus is inhibited by increasing concentrations of Class I epitope from HIV in a patient not exposed to the HIV virus.

## VSV ELISPOT Response for Different Routes of Administration

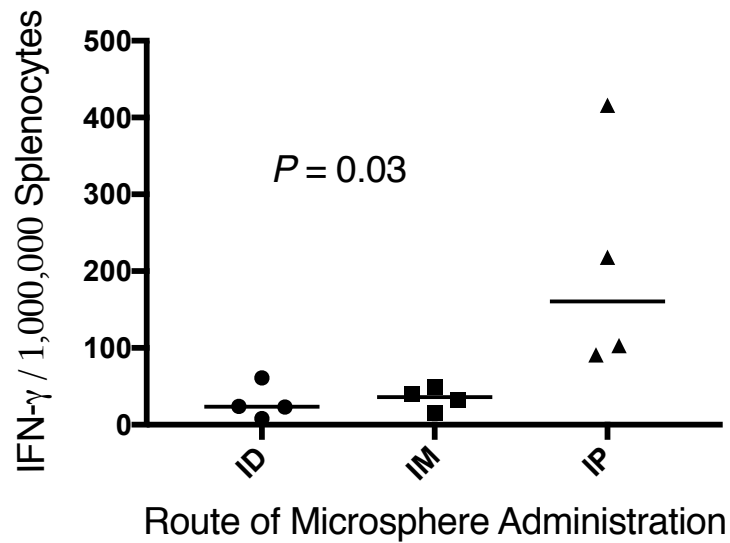

Figure 10: Differential ELISPOT response to intradermal tail (ID) intramuscular (IM) and intraperitoneal administration of 2mg of adjuvanted microspheres loaded with VSV Class I epitope RGYVYQGL.

## OVA ELISPOT Response for Different Routes of Administration

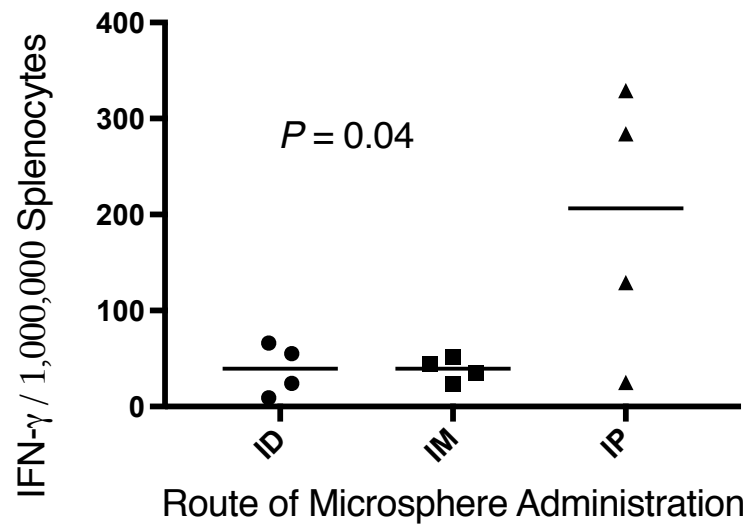

Figure 11: Differential ELISPOT response to intradermal tail (ID) intramuscular (IM) and intraperitoneal administration of 2mg of adjuvanted microspheres loaded with OVA Class I epitope RGYVYQGL.

| Adjuvanted Microsphere Loaded Component | Amount     |
|-----------------------------------------|------------|
| Peptide                                 | 0.1% w/w   |
| CpG                                     | 0.025% w/w |
| Mannose                                 | 0.01% w/w  |

Table 12: Composition of 11 $\mu$ M PLGA (Resomer 502H) adjuvanted microspheres used for the study.

| Injectate Component | Amount        |
|---------------------|---------------|
| Polysorbate 20      | 0.01% (v/v)   |
| MPLA                | 50 $\mu$ g/ml |

Table 13: Composition of PBS injectate used for the study.

| Peptide Sequence    | Description  |
|---------------------|--------------|
| SIINFEKL            | OVA Class I  |
| ISQAVHAAHAEINEAGR   | OVA Class II |
| RGYVYQGL            | VSV Class I  |
| SSKAGVFEHPHIGDASSGL | VSV Class II |

Table 14: Class I and Class II peptides used in the study. Any single microsphere used to inoculate mice for this study contained only one of the epitopes in this table.

## References

- [1] C Burkhardt, G Freer, R Castro, L Adorini, KH Wiesmuller, RM Zinkernagel, and H Hengartner. Characterization of t-helper epitopes of the glycoprotein of vesicular stomatitis virus. *JOURNAL OF VIROLOGY*, pages 1573 – 1580, 1994. URL <https://www.ncbi.nlm.nih.gov/pubmed/7508998>.
- [2] CM Celluzzi, JI Mayordomo, WJ Walter J. Storkus, MT Lotze, and LD Faló. Peptide-pulsed dendritic cells induce antigen-specific, ctl-mediated protective tumor immunity. *Journal of Experimental Medicine*, pages 283, 287, 1996. doi: DOI: 10.1084/jem.183.1.283.
- [3] R Kenney, S Frech, L Muenz, C Villar, and G Glenn. Dose sparing with intradermal injection of influenza vaccine. *NEJM*, 351(6), 2004. doi: 10.1056/NEJMoa043540. URL <https://doi.org/10.1056/NEJMoa043540>.
- [4] C Lock, D Smilek, A Gautam, M Vaysburd, S Dwivedy, and H McDevitt. Competitive inhibition of antigen presentation in animal models of autoimmune disease. In *Seminars in immunology*, volume 3, pages 247–255, 1991.
- [5] CP Parungo, D Soybel, YL Colson, SW Kim, S Ohnishi, AM De Grand, RG Laurence, FY Chen, EG Soltesz, LH Cohn, MC Bawendi, and JV Frangioni. Lymphatic drainage of the peritoneal space: A pattern dependent on bowel lymphatics. *Ann Surg Oncol.*, 14(2):286–298, 2007. doi: DOI: 10.1245/s10434-006-9044-6.
- [6] R. M. Rubsamen, C. V. Herst, P. M. Lloyd, and D. E. Heckerman. Eliciting cytotoxic t-lymphocyte responses from synthetic vectors containing one or two epitopes in a c57bl/6 mouse model using peptide-containing biodegradable microspheres and adjuvants. *Vaccine*, 32:4111–4116, 2014. doi: 10.1016/j.vaccine.2014.05.071. URL <https://doi.org/10.1016/j.vaccine.2014.05.071>.



- [7] I Sakita, H Hörig, R Sun, F Wang, and SG Nathenson. In vivo ctl immunity can be elicited by in vitro reconstituted mhc/peptide complex. *Journal of Immunological Methods*, pages 105,115, 1996. doi: [doi.org/10.1016/0022-1759\(96\)00027-0](https://doi.org/10.1016/0022-1759(96)00027-0). URL [https://doi.org/10.1016/0022-1759\(96\)00027-0](https://doi.org/10.1016/0022-1759(96)00027-0).
- [8] CL Slingluff. The present and future of peptide vaccines for cancer: Single or multiple, long or short, alone or in combination? *Cancer journal*, 17 (5):343–350, 2011. doi: [10.1097/PPO.0b013e318233e5b2](https://doi.org/10.1097/PPO.0b013e318233e5b2). URL <https://doi.org/10.1097/PP0.0b013e318233e5b2>.
- [9] M Tozuka, T Oka, N Jounal, G Egawa, and K Ishi. Efficient antigen delivery to the draining lymph nodes is a key component in the immunogenic pathway of the intradermal vaccine. *Dermatological Science*, 82 (8), 2015. doi: <http://dx.doi.org/10.1016/j.jdermsci.2015.11.008>. URL <http://dx.doi.org/10.1016/j.jdermsci.2015.11.008>.
- [10] J Zhang, L De Masi, B John, W Chen, and DM Schifferli. In vivo ctl immunity can be elicited by in vitro reconstituted mhc/peptide complex. *icrobial Cell Factories*, 2014. doi: <http://www.microbialcellfactories.com/content/13/1/80>. URL <http://www.microbialcellfactories.com/content/13/1/80>.
